# Supplementary material
Source: publisher figshare collection journal article supplement (https://tandf.figshare.com/articles/dataset/_/1157154)
Supplement: Supplementary file 1 [file 3]

| Test | Date      | Time  | Condition | Air Flow | Location | Movement | Start Point (PPB) | Tracer Gas (PPB) |
|------|-----------|-------|-----------|----------|----------|----------|-------------------|------------------|
| A    | 2/22/2010 | 9:50  | Maximum   | 2        | Diffuser | N/A      | 0                 | 219375           |
| 1    | 2/22/2010 | 10:51 | 1         | 3        | 3        | 1        | 71                | 10169            |
| 2    | 2/22/2010 | 11:00 | 1         | 3        | 2        | 2        | 9                 | 719              |
| 3    | 2/22/2010 | 11:14 | 1         | 3        | 2        | 1        | 6                 | 55               |
| 4    | 2/22/2010 | 11:20 | 1         | 1        | 2        | 2        | 9                 | 24532            |
| 5    | 2/22/2010 | 11:55 | 1         | 1        | 3        | 1        | 21                | 3892             |
| 6    | 2/22/2010 | 14:25 | 1         | 1        | 1        | 1        | 17                | 6249             |
| 7    | 2/22/2010 | 14:44 | 1         | 3        | 3        | 2        | 17                | 1380             |
| 8    | 2/22/2010 | 14:52 | 1         | 2        | 2        | 1        | 16                | 886              |
| 10   | 2/22/2010 | 15:18 | 1         | 3        | 1        | 2        | 17                | 73               |
| 11   | 2/22/2010 | 15:25 | 1         | 2        | 2        | 2        | 12                | 5314             |
| 12   | 2/22/2010 | 15:36 | 1         | 2        | 1        | 1        | 11                | 97               |
| 13   | 2/22/2010 | 15:44 | 1         | 3        | 1        | 1        | 11                | 11               |
| 14   | 2/22/2010 | 15:59 | 1         | 2        | 1        | 2        | 6                 | 3965             |
| 15   | 2/22/2010 | 16:15 | 1         | 1        | 2        | 1        | 8                 | 8710             |
| 16   | 2/22/2010 | 16:37 | 1         | 1        | 3        | 2        | 11                | 9906             |
| 17   | 2/22/2010 | 17:04 | 1         | 1        | 1        | 2        | 18                | 19128            |
| 18   | 2/22/2010 | 17:30 | 1         | 2        | 3        | 2        | 20                | 8989             |
| B    | 3/3/2010  | 9:36  | Maximum   | 1        | Diffuser | N/A      | 0                 | 222763           |
| 19   | 3/3/2010  | 10:41 | 1         | 3        | 3        | 1        | 61                | 15914            |
| 20   | 3/3/2010  | 10:53 | 1         | 3        | 2        | 2        | 64                | 296              |
| 21   | 3/3/2010  | 11:24 | 1         | 3        | 2        | 1        | 65                | 317              |
| 22   | 3/3/2010  | 11:56 | 1         | 1        | 2        | 2        | 66                | 34422            |
| 23   | 3/3/2010  | 13:12 | 1         | 1        | 3        | 1        | 85                | 9366             |
| 24   | 3/3/2010  | 14:00 | 1         | 1        | 1        | 1        | 98                | 12446            |
| 25   | 3/3/2010  | 14:25 | 1         | 3        | 3        | 2        | 93                | 872              |
| 26   | 3/3/2010  | 14:46 | 1         | 2        | 2        | 1        | 88                | 1378             |
| 27   | 3/3/2010  | 15:04 | 1         | 2        | 3        | 1        | 88                | 6482             |
| 28   | 3/3/2010  | 15:19 | 1         | 3        | 1        | 2        | 88                | 1279             |
| 29   | 3/3/2010  | 15:34 | 1         | 2        | 2        | 2        | 87                | 6696             |

|    |           |       |         |   |          |     |     |        |
|----|-----------|-------|---------|---|----------|-----|-----|--------|
| 30 | 3/3/2010  | 15:52 | 1       | 2 | 1        | 1   | 83  | 1541   |
| 31 | 3/3/2010  | 16:05 | 1       | 3 | 1        | 1   | 83  | 91     |
| 32 | 3/3/2010  | 16:19 | 1       | 2 | 1        | 2   | 81  | 10361  |
| 33 | 3/3/2010  | 16:39 | 1       | 1 | 2        | 1   | 80  | 23609  |
| 34 | 3/3/2010  | 17:09 | 1       | 1 | 3        | 2   | 87  | 14795  |
| 35 | 3/3/2010  | 17:44 | 1       | 1 | 1        | 2   | 80  | 30790  |
| 36 | 3/3/2010  | 18:17 | 1       | 2 | 3        | 2   | 80  | 1781   |
| C  | 3/19/2010 | 9:37  | Maximum | 2 | Diffuser | N/A | 5   | 220432 |
| 37 | 3/19/2010 | 10:26 | 1       | 3 | 3        | 1   | 70  | 20340  |
| 38 | 3/19/2010 | 10:40 | 1       | 3 | 2        | 2   | 55  | 9055   |
| 39 | 3/19/2010 | 10:56 | 1       | 3 | 2        | 1   | 57  | 8899   |
| 40 | 3/19/2010 | 11:15 | 1       | 1 | 2        | 2   | 54  | 19031  |
| 41 | 3/19/2010 | 11:46 | 1       | 1 | 3        | 1   | 69  | 1255   |
| 42 | 3/19/2010 | 12:37 | 1       | 1 | 1        | 1   | 68  | 6038   |
| 43 | 3/19/2010 | 13:58 | 1       | 3 | 3        | 2   | 104 | 8532   |
| 44 | 3/19/2010 | 14:16 | 1       | 2 | 2        | 1   | 72  | 489    |
| 45 | 3/19/2010 | 14:36 | 1       | 2 | 3        | 1   | 71  | 21452  |
| 45 | 3/19/2010 | 14:54 | 1       | 3 | 1        | 2   | 71  | 122    |
| 47 | 3/19/2010 | 15:13 | 1       | 2 | 2        | 2   | 70  | 1517   |
| 48 | 3/19/2010 | 15:25 | 1       | 2 | 1        | 1   | 70  | 3361   |
| 49 | 3/19/2010 | 15:40 | 1       | 3 | 1        | 1   | 70  | 535    |
| 50 | 3/19/2010 | 15:55 | 1       | 2 | 1        | 2   | 68  | 2173   |
| 51 | 3/19/2010 | 16:11 | 1       | 1 | 2        | 1   | 74  | 12569  |
| 52 | 3/19/2010 | 16:40 | 1       | 1 | 3        | 2   | 82  | 7638   |
| 53 | 3/19/2010 | 17:00 | 1       | 1 | 1        | 2   | 79  | 8968   |
| 54 | 3/19/2010 | 17:21 | 1       | 2 | 3        | 2   | 76  | 1895   |
| D  | 8/27/2010 | 9:44  | Maximum | 2 | Diffuser | N/A | 11  | 218413 |
| 55 | 8/27/2010 | 10:05 | 2       | 3 | 3        | 1   | 11  | 80     |
| 56 | 8/27/2010 | 10:20 | 2       | 3 | 2        | 2   | 11  | 76     |
| 57 | 8/27/2010 | 10:38 | 2       | 3 | 2        | 1   | 10  | 175    |
| 58 | 8/27/2010 | 10:51 | 2       | 1 | 2        | 2   | 9   | 10372  |
| 59 | 8/27/2010 | 11:28 | 2       | 1 | 3        | 1   | 0   | 5706   |

|    |           |       |         |   |          |     |     |        |
|----|-----------|-------|---------|---|----------|-----|-----|--------|
| E  | 9/13/2010 | 15:04 | Maximum | 2 | Diffuser | N/A | 2   | 222948 |
| 60 | 9/13/2010 | 15:40 | 2       | 1 | 1        | 1   | 1   | 7650   |
| 61 | 9/13/2010 | 16:02 | 2       | 3 | 3        | 2   | 25  | 34     |
| 62 | 9/13/2010 | 16:20 | 2       | 2 | 2        | 1   | -4  | 932    |
| 63 | 9/13/2010 | 16:30 | 2       | 2 | 3        | 1   | 2   | 663    |
| 64 | 9/13/2010 | 17:03 | 2       | 3 | 1        | 2   | 0   | 13     |
| 65 | 9/13/2010 | 17:29 | 2       | 2 | 2        | 2   | -25 | 2376   |
| 66 | 9/13/2010 | 17:43 | 2       | 2 | 1        | 1   | 0   | 101    |
| 67 | 9/13/2010 | 17:57 | 2       | 3 | 1        | 1   | -13 | 179    |
| 68 | 9/13/2010 | 18:10 | 2       | 2 | 1        | 2   | -8  | 633    |
| 69 | 9/13/2010 | 18:22 | 2       | 1 | 2        | 1   | -9  | 15325  |
| 70 | 9/13/2010 | 18:37 | 2       | 1 | 3        | 2   | 14  | 2826   |
| 71 | 9/13/2010 | 18:56 | 2       | 1 | 1        | 2   | -2  | 4804   |
| 72 | 9/13/2010 | 19:16 | 2       | 2 | 3        | 2   | 6   | 352    |
| F  | 9/14/2010 | 9:00  | Maximum | 2 | Diffuser | N/A | 6   | 224375 |
| 73 | 9/14/2010 | 10:21 | 2       | 3 | 3        | 1   | 0   | 635    |
| 74 | 9/14/2010 | 10:37 | 2       | 3 | 2        | 2   | 4   | 141    |
| 75 | 9/14/2010 | 10:53 | 2       | 3 | 2        | 1   | 3   | 537    |
| 76 | 9/14/2010 | 11:10 | 2       | 1 | 2        | 2   | 7   | 6647   |
| 77 | 9/14/2010 | 11:40 | 2       | 1 | 3        | 1   | 10  | 5708   |
| 78 | 9/14/2010 | 12:07 | 2       | 1 | 1        | 1   | 10  | 17464  |
| 79 | 9/14/2010 | 12:22 | 2       | 3 | 3        | 2   | 5   | 11     |
| 80 | 9/14/2010 | 12:42 | 2       | 2 | 2        | 1   | -10 | 4505   |
| 81 | 9/14/2010 | 12:54 | 2       | 2 | 3        | 1   | -9  | 5287   |
| 82 | 9/14/2010 | 14:19 | 2       | 3 | 1        | 2   | 7   | 29     |
| 83 | 9/14/2010 | 14:34 | 2       | 2 | 2        | 2   | 8   | 1081   |
| 84 | 9/14/2010 | 14:48 | 2       | 2 | 1        | 1   | 7   | 384    |
| 85 | 9/14/2010 | 15:00 | 2       | 3 | 1        | 1   | 7   | 179    |
| 86 | 9/14/2010 | 15:14 | 2       | 2 | 1        | 2   | 0   | 433    |
| 87 | 9/14/2010 | 15:29 | 2       | 1 | 2        | 1   | 6   | 21523  |
| 88 | 9/14/2010 | 15:48 | 2       | 1 | 3        | 2   | 18  | 6552   |
| 89 | 9/14/2010 | 16:00 | 2       | 1 | 1        | 2   | 26  | 10643  |

|     |            |       |         |   |          |     |    |        |
|-----|------------|-------|---------|---|----------|-----|----|--------|
| 90  | 9/14/2010  | 16:25 | 2       | 2 | 3        | 2   | 26 | 400    |
| G   | 9/17/2010  | 8:55  | Maximum | 2 | Diffuser | N/A | 0  | 224665 |
| 91  | 9/17/2010  | 10:19 | 2       | 3 | 3        | 1   | 0  | 1739   |
| 92  | 9/17/2010  | 10:29 | 2       | 3 | 2        | 2   | 5  | 1289   |
| 93  | 9/17/2010  | 10:43 | 2       | 3 | 2        | 1   | 10 | 372    |
| 94  | 9/17/2010  | 10:55 | 2       | 1 | 2        | 2   | 6  | 5873   |
| 95  | 9/17/2010  | 11:24 | 2       | 1 | 3        | 1   | 7  | 4319   |
| 96  | 9/17/2010  | 11:44 | 2       | 1 | 1        | 1   | 22 | 6792   |
| 97  | 9/17/2010  | 12:10 | 2       | 3 | 3        | 2   | 19 | 20     |
| 98  | 9/17/2010  | 12:23 | 2       | 2 | 2        | 1   | 21 | 1446   |
| 99  | 9/17/2010  | 12:39 | 2       | 2 | 3        | 1   | 23 | 54     |
| 100 | 9/17/2010  | 13:47 | 2       | 3 | 1        | 2   | 0  | 19     |
| 101 | 9/17/2010  | 14:07 | 2       | 2 | 2        | 2   | 3  | 284    |
| 102 | 9/17/2010  | 14:19 | 2       | 2 | 1        | 1   | 12 | 6657   |
| 103 | 9/17/2010  | 14:30 | 2       | 3 | 1        | 1   | 17 | 45     |
| 104 | 9/17/2010  | 14:40 | 2       | 2 | 1        | 2   | 9  | 1092   |
| 105 | 9/17/2010  | 14:53 | 2       | 1 | 2        | 1   | 4  | 13232  |
| 106 | 9/17/2010  | 15:25 | 2       | 1 | 3        | 2   | 5  | 1834   |
| 107 | 9/17/2010  | 15:43 | 2       | 1 | 3        | 2   | 10 | 14243  |
| 108 | 9/17/2010  | 16:19 | 2       | 2 | 3        | 2   | 18 | 35     |
| H   | 10/26/2010 | 9:20  | Maximum | 2 | Diffuser | N/A | 0  | 218947 |
| 109 | 10/26/2010 | 9:55  | 2       | 4 | 2        | 2   | -2 | 71     |
| 110 | 10/26/2010 | 10:12 | 2       | 4 | 3        | 2   | 7  | 22     |
| 111 | 10/26/2010 | 10:22 | 2       | 4 | 1        | 2   | 6  | 33     |
| 112 | 10/26/2010 | 10:36 | 2       | 4 | 2        | 2   | 9  | 17     |
| 113 | 10/26/2010 | 10:47 | 2       | 4 | 3        | 2   | 8  | 79     |
| 114 | 10/26/2010 | 11:07 | 2       | 4 | 1        | 2   | 9  | 39     |
| 115 | 10/26/2010 | 11:23 | 2       | 4 | 2        | 2   | 7  | 37     |
| 116 | 10/26/2010 | 11:38 | 2       | 4 | 3        | 2   | 8  | 16     |
| 117 | 10/26/2010 | 11:49 | 2       | 4 | 1        | 2   | 7  | 12     |
|     |            |       |         |   |          |     |    |        |
